# Supplementary material for: Serum-Based Quantification of MYCN Gene Amplification in Young Patients with Neuroblastoma: Potential Utility as a Surrogate Biomarker for Neuroblastoma
Source: PubMed Central journal article supplement (PMC4981470; doi:10.1371/journal.pone.0161039), 2016-08-11

**Supplemental Figure 3**

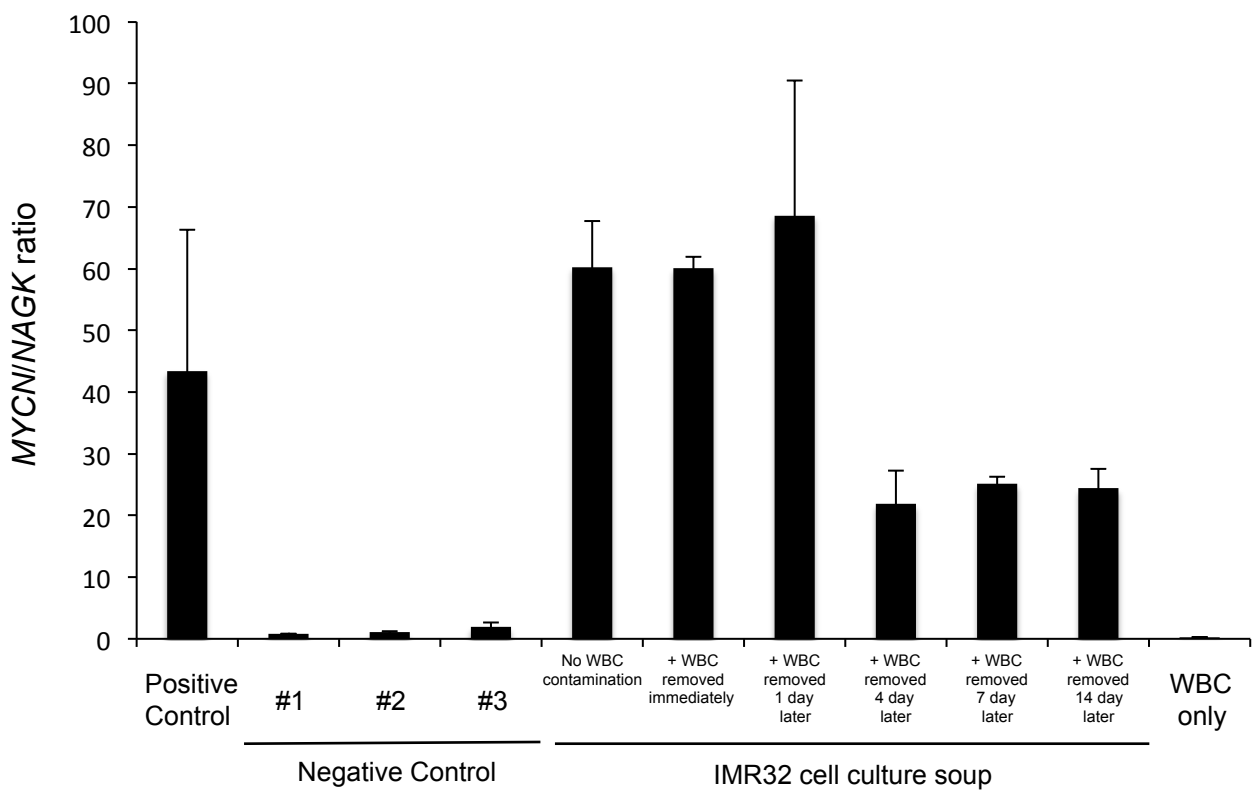

Supplement: pone.0161039.s003.pdf [file pone.0161039.s003.pdf]
